# Supplementary material
Source: HighWire-hosted journal article supplement (http://www.cmajopen.ca/highwire/filestream/84456/field_highwire_adjunct_files/2/CMAJOpen-2020-0003-2-at.pdf)
Supplement: CMAJOpen-2020-0003-2-at.pdf [file CMAJOpen-2020-0003-2-at.pdf]

## APPENDIX 2 (as supplied by the authors). Search Strategies by Database

The following search strategy will be used for MEDLINE:

|   |                                                                                                                                                                                                                                                                                                                                                                                                                                                                                    |
|---|------------------------------------------------------------------------------------------------------------------------------------------------------------------------------------------------------------------------------------------------------------------------------------------------------------------------------------------------------------------------------------------------------------------------------------------------------------------------------------|
| 1 | Search ("prevention and control" [Subheading] OR "Secondary Prevention"[Mesh] OR "Primary Prevention"[Mesh:noexp] OR prevent* [tiab] OR reduc* [tiab])                                                                                                                                                                                                                                                                                                                             |
| 2 | Search Venous thrombosis [mh] OR thromboembolism [mh] OR thrombosis [mh:noexp] OR pulmonary embolism [mh:noexp] OR thromboprophyla* [tiab] OR thrombus* [tiab] OR thrombolic* [tiab] OR thromboemboli* [tiab] OR thrombos* [tiab] OR embol* [tiab] OR dvt* [tiab] OR vte [tiab] OR "pulmonary embolism" [tiab] OR "blood clot" [tiab] OR "vein thrombosis" [tiab] OR "deep vein thrombosis" [tiab] OR "venous thromboembolism" [tiab] OR phlebothrombosis [tiab] OR emboli* [tiab] |
| 3 | Search "Early Ambulation"[Mesh] OR "Rehabilitation"[Mesh:NoExp] OR "Exercise Therapy"[Mesh] OR "Walking"[Mesh] OR "Exercise"[Mesh] OR walk* [tiab] OR exercis* [tiab] OR ambulat* [tiab] OR rehabilit* [tiab]                                                                                                                                                                                                                                                                      |
| 4 | Search animals [mh] NOT humans [mh]                                                                                                                                                                                                                                                                                                                                                                                                                                                |
| 5 | Search (#1 AND #2 AND #3) NOT #4                                                                                                                                                                                                                                                                                                                                                                                                                                                   |

The following search strategy will be used for EMBASE:

|   |                                                                                                                                                                                                                                                                                                                                                                                                                                                                                                                                                                                                      |
|---|------------------------------------------------------------------------------------------------------------------------------------------------------------------------------------------------------------------------------------------------------------------------------------------------------------------------------------------------------------------------------------------------------------------------------------------------------------------------------------------------------------------------------------------------------------------------------------------------------|
| 1 | 'deep vein thrombosis'/exp OR 'deep vein thrombosis' OR 'vein thrombosis'/exp OR 'vein thrombosis' OR 'thrombosis'/exp OR 'thrombosis' OR 'thromboembolism'/exp OR 'thromboembolism' OR 'lung embolism'/exp OR 'lung embolism' OR thromboprophyla*:ab,ti OR thrombus*:ab,ti OR thrombolic*:ab,ti OR thromboemboli*:ab,ti OR thrombos*:ab,ti OR embol*:ab,ti OR dvt*:ab,ti OR vte:ab,ti OR ((pulmonary NEAR/3 embolism):ab,ti) OR 'blood clot':ab,ti OR ((vein NEAR/3 thrombosis):ab,ti) OR 'deep vein thrombosis':ab,ti OR 'venous thromboembolism':ab,ti OR phlebothrombosis:ab,ti OR emboli*:ab,ti |
| 2 | 'mobilization'/exp OR 'walking'/exp OR 'kinesiotherapy'/exp OR 'rehabilitation'/de OR walk*:ab,ti OR ambulat*:ab,ti OR exercis*:ab,ti OR rehabilit*:ab,ti                                                                                                                                                                                                                                                                                                                                                                                                                                            |
| 3 | 'prevention and control'/exp OR 'primary prevention'/exp OR 'secondary prevention'/exp OR prevent*:ab,ti OR reduc*:ab,ti                                                                                                                                                                                                                                                                                                                                                                                                                                                                             |
| 4 | #1 AND #2 AND #3                                                                                                                                                                                                                                                                                                                                                                                                                                                                                                                                                                                     |
| 5 | 'animal'/exp NOT 'human'/exp                                                                                                                                                                                                                                                                                                                                                                                                                                                                                                                                                                         |
| 6 | #4 NOT #5                                                                                                                                                                                                                                                                                                                                                                                                                                                                                                                                                                                            |

The following search strategy will be used for Cochrane:

|    |                                                           |
|----|-----------------------------------------------------------|
| #1 | MeSH descriptor: [Primary Prevention] explode all trees   |
| #2 | MeSH descriptor: [Secondary Prevention] explode all trees |
| #3 | #1 or #2 or prevent* or reduc*                            |
| #4 | MeSH descriptor: [Venous Thrombosis] explode all trees    |

Appendix to: Lau BD, Murphy P, Nastasi AJ et al. Effectiveness of ambulation to prevent venous thromboembolism in patients admitted to hospital: a systematic review. *CMAJ Open* 2020. DOI:10.9778/cmajo.20200003. Copyright © 2020 Joule Inc. or its licensors

|     |                                                                                                                                                                                                                                                                             |
|-----|-----------------------------------------------------------------------------------------------------------------------------------------------------------------------------------------------------------------------------------------------------------------------------|
| #5  | MeSH descriptor: [Thromboembolism] explode all trees                                                                                                                                                                                                                        |
| #6  | MeSH descriptor: [Thrombosis] this term only                                                                                                                                                                                                                                |
| #7  | MeSH descriptor: [Pulmonary Embolism] this term only                                                                                                                                                                                                                        |
| #8  | "deep vein thrombosis" or "vein thrombosis" or thromboprophyla* or thrombus* or thrombolic* or thromboemboli* or thrombos* or emboli* or dvt* or vte or pulmonary near/3 embolism or vein near/3 thrombosis or "blood clot" or phlebothrombosis or "venous thromboembolism" |
| #9  | #4 or #5 or #6 or #7 or #8                                                                                                                                                                                                                                                  |
| #10 | MeSH descriptor: [Early Ambulation] explode all trees                                                                                                                                                                                                                       |
| #11 | MeSH descriptor: [Rehabilitation] explode all trees                                                                                                                                                                                                                         |
| #12 | MeSH descriptor: [Exercise] explode all trees                                                                                                                                                                                                                               |
| #13 | MeSH descriptor: [Walking] explode all trees                                                                                                                                                                                                                                |
| #14 | #10 or #11 or #12 or #13 or walk* or exercis* or abmulat* or rehabilit*                                                                                                                                                                                                     |

*The following search strategy will be used for Web of Science:*

TS=("deep vein thrombosis" OR "vein thrombosis" OR thromboprophyla\* OR thrombus\* OR thrombolic\* OR thromboemboli\* OR thrombos\* OR emboli\* OR dvt\* OR vte OR pulmonary NEAR/3 embolism OR vein NEAR/3 thrombosis OR "blood clot" OR phlebothrombosis OR "venous thromboembolism")

AND

TS=(ambulat\* OR walk\* OR exercis\* OR rehabilitat\* OR mobiliza\*)

AND

TS=(prevent\* OR reduc\*)

Indexes=SCI-EXPANDED, SSCI, A&HCI, CPCI-S, CPCI-SSH, BKCI-S, BKCI-SSH, ESCI, CCR-EXPANDED, IC

*The following search strategy will be used for Scopus:*

(( (TITLE-ABS-KEY ("deep vein thrombosis" OR "vein thrombosis" OR thromboprophyla\* OR thrombus\* OR thrombolic\* OR thromboemboli\* OR thrombos\* OR emboli\* OR dvt\* OR vte) OR TITLE-ABS-KEY (pulmonary W/3 embolism OR vein W/3 thrombosis OR "blood clot" OR phlebothrombosis OR "venous thromboembolism" )))

AND

(TITLE-ABS-KEY (ambulat\* OR walk\* OR exercis\* OR rehabilitat\* OR mobiliza\*))

AND

( TITLE-ABS-KEY ( prevent\* OR reduc\* ) )
